# Supplementary material for: Analysis of Early Biomarkers Associated with the Development of Critical Respiratory Failure in Coronavirus Disease 2019 (COVID-19)
Source: MDPI journal article supplement (doi:10.3390/diagnostics12020339), 2022-01-28
Supplement: s1 [file s1]

**Tables S1.** Validation analyses of the ROC analyses

| <b>A. Logistic regression analysis</b>                           |                      |                    |                    |                 |              |                     |                |                  |
|------------------------------------------------------------------|----------------------|--------------------|--------------------|-----------------|--------------|---------------------|----------------|------------------|
|                                                                  |                      |                    | <b>Univariate</b>  |                 |              | <b>Multivariate</b> |                |                  |
| <b>Variable</b>                                                  | <b>Cut off level</b> | <b>Odds ratio</b>  | <b>95%CI</b>       | <b>P value</b>  | <b>RR</b>    | <b>95%CI</b>        | <b>p value</b> |                  |
| <b>Biomarkers at admission</b>                                   |                      |                    |                    |                 |              |                     |                |                  |
| CRP (mg/dL)                                                      | 8.0                  | 44.6               | 9.1–336.4          | <0.001 *        | 33.2         | 3.4–874.8           | 0.007 *        |                  |
| Interleukin-6 (pg/mL)                                            | 133.0                | 67.5               | 11.2–596.4         | <0.001 *        | 38.7         | 2.6–216.1           | 0.014          |                  |
| KL-6 (IU/mL)                                                     | 382.0                | 28.5               | 5.1–184.4          | <0.001 *        | 64.6         | 3.8–2389.5          | 0.006 *        |                  |
| <b>Biomarkers at 3 days after admission</b>                      |                      |                    |                    |                 |              |                     |                |                  |
| Platelet counts (×10 <sup>4</sup> /uL)                           | 17.2                 | 13.9               | 2.1–275.9          | 0.020*          | 18.6         | 1.7–572.9           | 0.033 *        |                  |
| CRP (mg/dL)                                                      | 2.2                  | 3.4                | 0.63–26.1          | 0.17            | 0.40         | 0.010–6.4           | 0.52           |                  |
| HMGB-1 (ng/mL)                                                   | 13.4                 | 34184160.6         | 0–NA               | 0.99            | 1303873456.3 | 0–NA                | 0.99           |                  |
| D-dimmer (ug/mL)                                                 | 1.9                  | 7.5                | 1.2–47.2           | 0.025 *         | 2.0          | 0.13–32.0           | 0.61           |                  |
| <b>B. ROC analysis with 5 repeated 10-fold cross-validation.</b> |                      |                    |                    |                 |              |                     |                |                  |
|                                                                  | <b>AUC</b>           | <b>Sensitivity</b> | <b>Specificity</b> | <b>Accuracy</b> | <b>Kappa</b> | <b>Precision</b>    | <b>Recall</b>  | <b>F measure</b> |
| <b>Biomarkers at admission</b>                                   | 0.92                 | 0.99               | 0.67               | 0.97            | 0.65         | 0.98                | 0.99           | 0.99             |
| <b>Biomarkers at 3 days</b>                                      | 0.88                 | 0.96               | 0.47               | 0.92            | 0.34         | 0.96                | 0.96           | 0.95             |
| <b>after admission</b>                                           |                      |                    |                    |                 |              |                     |                |                  |

KL-6, Krebs von den Lungen; HMGB-1, high mobility group box 1; ROC, Receiver Operating Characteristic; 95%CI, 95% confidence interval. \* A value of  $p < 0.05$  was considered to represent statistical significance.

Tables S2. Correlation among biomarkers

| A. Analysis of biomarkers at admission              |           |           |          |           |           |           |            |           |           |           |          |           |
|-----------------------------------------------------|-----------|-----------|----------|-----------|-----------|-----------|------------|-----------|-----------|-----------|----------|-----------|
|                                                     |           |           |          |           |           |           | R, p value |           |           |           |          |           |
|                                                     | Neut      | Lym       | Plt      | CRP       | LDH       | Fer       | IL-6       | IL-18     | KL-6      | HMGB-1    | sCD163   | D-dimmer  |
| Neutrophil (uL)                                     | -         | 0.034     | 0.19     | 0.49      | 0.38      | 0.30      | 0.24       | 0.073     | 0.25      | 0.55      | 0.052    | 0.32      |
|                                                     |           | 0.69      | 0.024 *  | <0.0001 * | <0.0001 * | 0.0006 *  | 0.0077 *   | 0.44      | 0.0070 *  | <0.0001 * | 0.59     | 0.0001 *  |
| Lymphocyte (uL)                                     | 0.034     | -         | 0.019    | -0.24     | -0.19     | -0.12     | -0.26      | -0.13     | 0.054     | 0.15      | 0.047    | -0.17     |
|                                                     | 0.69      |           | 0.025 *  | 0.0053 *  | 0.026 *   | 0.18      | 0.0037 *   | 0.16      | 0.56      | 0.11      | 0.62     | 0.046 *   |
| Platelet (×10 <sup>4</sup> /uL)                     | 0.19      | 0.019     | -        | -0.13     | -0.060    | -0.20     | -0.30      | -0.17     | -0.087    | 0.23      | -0.10    | 0.031     |
|                                                     | 0.024 *   | 0.025 *   |          | 0.13      | 0.49      | 0.020 *   | 0.0006 *   | 0.076     | 0.35      | 0.014 *   | 0.30     | 0.72      |
| CRP (mg/dL)                                         | 0.49      | -0.24     | -0.13    | -         | 0.68      | 0.71      | 0.64       | 0.47      | 0.27      | 0.17      | 0.24     | 0.37      |
|                                                     | <0.0001 * | 0.0053 *  | 0.13     |           | <0.0001 * | <0.0001 * | <0.0001 *  | <0.0001 * | 0.0033 *  | 0.084     | 0.012 *  | <0.0001   |
| Lactate dehydrogenase (IU/L)                        | 0.38      | -0.19     | -0.060   | 0.68      | -         | 0.69      | 0.53       | 0.57      | 0.37      | 0.31      | 0.29     | 0.40      |
|                                                     | <0.0001 * | 0.026 *   | 0.49     | <0.0001 * |           | <0.0001 * | <0.0001 *  | <0.0001 * | <0.0001 * | 0.0011 *  | 0.0021 * | <0.0001 * |
| Ferritin (ng/mL)                                    | 0.30      | -0.12     | -0.20    | 0.71      | 0.69      | -         | 0.63       | 0.60      | 0.31      | 0.15      | 0.31     | 0.21      |
|                                                     | 0.0006 *  | 0.18      | 0.020 *  | <0.0001 * | <0.0001 * |           | <0.0001 *  | <0.0001 * | 0.0005 *  | 0.13      | 0.0009 * | 0.020 *   |
| Interleukin-6 (pg/mL)                               | 0.24      | -0.26     | -0.30    | 0.64      | 0.53      | 0.63      | -          | 0.48      | 0.21      | -0.0049   | 0.28     | 0.16      |
|                                                     | 0.0077 *  | 0.0037 *  | 0.0006 * | <0.0001 * | <0.0001 * | <0.0001 * |            | <0.0001 * | 0.021 *   | 0.96      | 0.0028 * | 0.11      |
| Interleukin-18 (pg/mL)                              | 0.073     | -0.13     | -0.17    | 0.47      | 0.57      | 0.60      | 0.48       | -         | 0.13      | 0.16      | 0.35     | 0.16      |
|                                                     | 0.44      | 0.16      | 0.076    | <0.0001 * | <0.0001 * | <0.0001 * | <0.0001 *  |           | 1.15      | 0.11      | 0.0003 * | 0.11      |
| KL-6 (IU/mL)                                        | 0.25      | 0.054     | -0.087   | 0.27      | 0.37      | 0.31      | 0.21       | 0.13      | -         | 0.19      | 0.28     | 0.35      |
|                                                     | 0.0070 *  | 0.56      | 0.35     | 0.0033 *  | <0.0001 * | 0.0005 *  | 0.021 *    | 1.15      |           | 0.060 *   | 0.038 *  | <0.0001 * |
| HMGB-1 (ng/mL)                                      | 0.55      | 0.15      | 0.23     | 0.17      | 0.31      | 0.15      | -0.0049    | 0.16      | 0.19      | -         | 0.086    | 0.11      |
|                                                     | <0.0001 * | 0.11      | 0.014 *  | 0.084     | 0.0011 *  | 0.13      | 0.96       | 0.11      | 0.060 *   |           | 0.37     | 0.25      |
| Soluble CD163 (ng/mL)                               | 0.052     | 0.047     | -0.10    | 0.24      | 0.29      | 0.31      | 0.28       | 0.35      | 0.28      | 0.086     | -        |           |
|                                                     | 0.59      | 0.62      | 0.30     | 0.012 *   | 0.0021 *  | 0.0009 *  | 0.0028 *   | 0.0003 *  | 0.038 *   | 0.37      |          |           |
| D-dimer (ug/mL)                                     | 0.32      | -0.17     | 0.031    | 0.37      | 0.40      | 0.21      | 0.16       | 0.16      | 0.35      | 0.11      | 0.32     | -         |
|                                                     | 0.0001 *  | 0.046 *   | 0.72     | <0.0001   | <0.0001 * | 0.020 *   | 0.11       | 0.11      | <0.0001 * | 0.25      | 0.0007 * |           |
| B. Analysis of biomarkers at 3 days after admission |           |           |          |           |           |           |            |           |           |           |          |           |
|                                                     |           |           |          |           |           |           | R, p value |           |           |           |          |           |
|                                                     | Neut      | Lym       | Plt      | CRP       | LDH       | Fer       | IL-6       | HMGB-1    | sCD163    | D-dimmer  |          |           |
| Neutrophil (uL)                                     | -         | -0.19     | 0.28     | 0.44      | 0.42      | 0.35      | 0.11       | 0.69      | 0.16      | 0.34      |          |           |
|                                                     |           | 0.039 *   | 0.0021 * | <0.0001 * | <0.0001 * | 0.0006 *  | 0.29       | <0.0001 * | 0.12      | 0.0007 *  |          |           |
| Lymphocyte (uL)                                     | -0.19     | -         | 0.29     | -0.044    | -0.48     | -0.45     | -0.47      | -0.21     | -0.17     | -0.27     |          |           |
|                                                     | 0.039 *   |           | 0.0011 * | 0.63      | <0.0001 * | <0.0001 * | <0.0001 *  | 0.049 *   | 0.11      | 0.0080 *  |          |           |
| Platelet (×10 <sup>4</sup> /uL)                     | 0.28      | 0.29      | -        | -0.044    | -0.070    | -0.092    | -0.31      | 0.079     | -0.0088   | 0.11      |          |           |
|                                                     | 0.0021 *  | 0.0011 *  |          | 0.63      | 0.44      | 0.38      | 0.0024 *   | 0.46      | 0.93      | 0.28      |          |           |
| CRP (mg/dL)                                         | 0.44      | -0.044    | -0.044   | -         | 0.69      | 0.67      | 0.56       | 0.43      | 0.36      | 0.37      |          |           |
|                                                     | <0.0001 * | 0.63      | 0.63     |           | <0.0001 * | <0.0001 * | <0.0001 *  | <0.0001 * | 0.0005 *  | 0.0002 *  |          |           |
| Lactate dehydrogenase (IU/L)                        | 0.42      | -0.48     | -0.070   | 0.69      | -         | 0.77      | 0.51       | 0.54      | 0.42      | 0.36      |          |           |
|                                                     | <0.0001 * | <0.0001 * | 0.44     | <0.0001 * |           | <0.0001 * | <0.0001 *  | <0.0001 * | <0.0001 * | 0.0004 *  |          |           |
| Ferritin (ng/mL)                                    | 0.35      | -0.45     | -0.092   | 0.67      | 0.77      | -         | 0.54       | 0.50      | 0.45      | 0.29      |          |           |
|                                                     | 0.0006 *  | <0.0001 * | 0.38     | <0.0001 * | <0.0001 * |           | <0.0001 *  | <0.0001 * | <0.0001 * | 0.013 *   |          |           |

|                       |           |           |          |           |           |           |          |         |           |           |  |  |
|-----------------------|-----------|-----------|----------|-----------|-----------|-----------|----------|---------|-----------|-----------|--|--|
| Interleukin-6 (pg/mL) | 0.11      | -0.47     | -0.31    | 0.56      | 0.51      | 0.54      | -        | 0.19    | 0.27      | 0.022     |  |  |
|                       | 0.29      | <0.0001 * | 0.0024 * | <0.0001 * | <0.0001 * | <0.0001 * |          | 0.073   | 0.0092 *  | 0.85      |  |  |
| HMGB-1 (ng/mL)        | 0.69      | -0.21     | 0.079    | 0.43      | 0.54      | 0.50      | 0.19     | -       | 0.086     | 0.27      |  |  |
|                       | <0.0001 * | 0.049 *   | 0.46     | <0.0001 * | <0.0001 * | <0.0001 * | 0.073    |         | 0.37      | 0.018 *   |  |  |
| Soluble CD163 (ng/mL) | 0.16      | -0.17     | -0.0088  | 0.36      | 0.42      | 0.45      | 0.27     | 0.086   | -         | 0.47      |  |  |
|                       | 0.12      | 0.11      | 0.93     | 0.0005 *  | <0.0001 * | <0.0001 * | 0.0092 * | 0.37    |           | <0.0001 * |  |  |
| D-dimer (ug/mL)       | 0.34      | -0.27     | 0.11     | 0.37      | 0.36      | 0.29      | 0.022    | 0.27    | 0.47      | -         |  |  |
|                       | 0.0007 *  | 0.0080 *  | 0.28     | 0.0002 *  | 0.0004 *  | 0.013 *   | 0.85     | 0.018 * | <0.0001 * |           |  |  |

Neut, neutrophil; Lym, lymphocyte; Plt, platelet; LDH, lactate dehydrogenase; Fer, ferritin; IL-6, interleukin-6; IL-18, interleukin-18; sCD163, soluble CD163. \* A value of  $p < 0.05$  was considered to represent statistical significance.
